# Supplementary material for: Post-polymerization functionalization of poly(3,4-propylenedioxythiophene) (PProDOT) via thiol–ene “click” chemistry
Source: Royal Society of Chemistry journal article supplement (doi:10.1039/c4tb02033b), 2015-01-01
Supplement: c4tb02033b1.pdf [file c4tb02033b1.pdf]

## Supporting Information

### Post-polymerization functionalization of poly(3,4-propylenedioxythiophene) (PProDOT) *via* thiol-ene “click” chemistry

Bin Wei, Liangqi Ouyang, Jinglin Liu, David C Martin\*

Department of Materials Science and Engineering, The University of Delaware, Newark,  
Delaware 19716

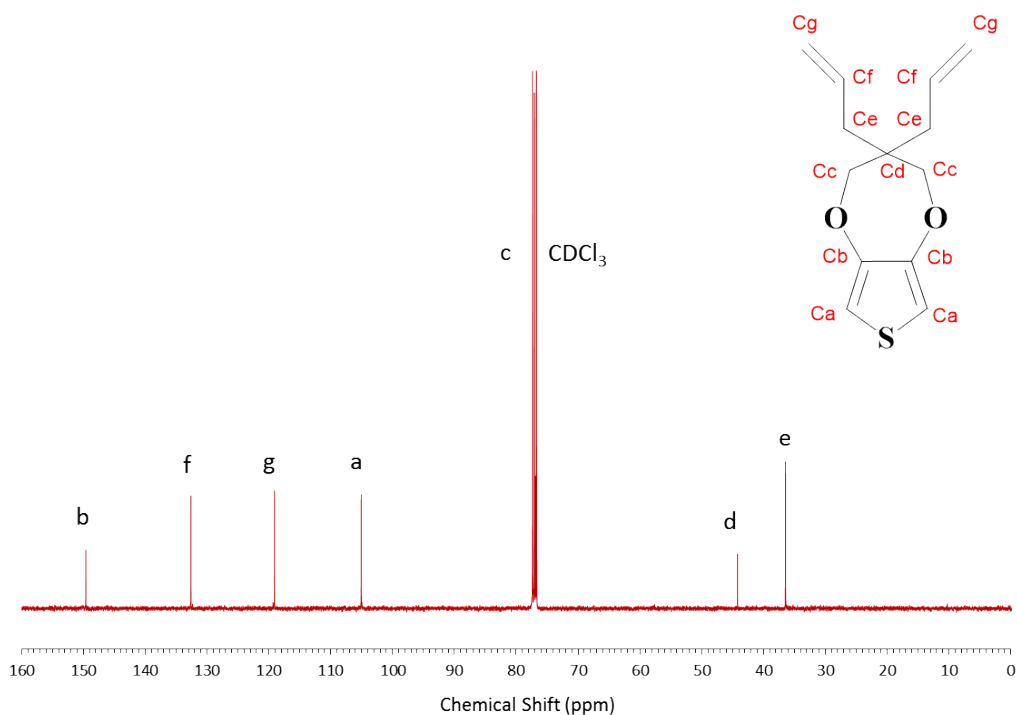

**Figure S1.**  $^{13}\text{C}$  NMR spectra of ProDOT-diene in  $\text{CDCl}_3$

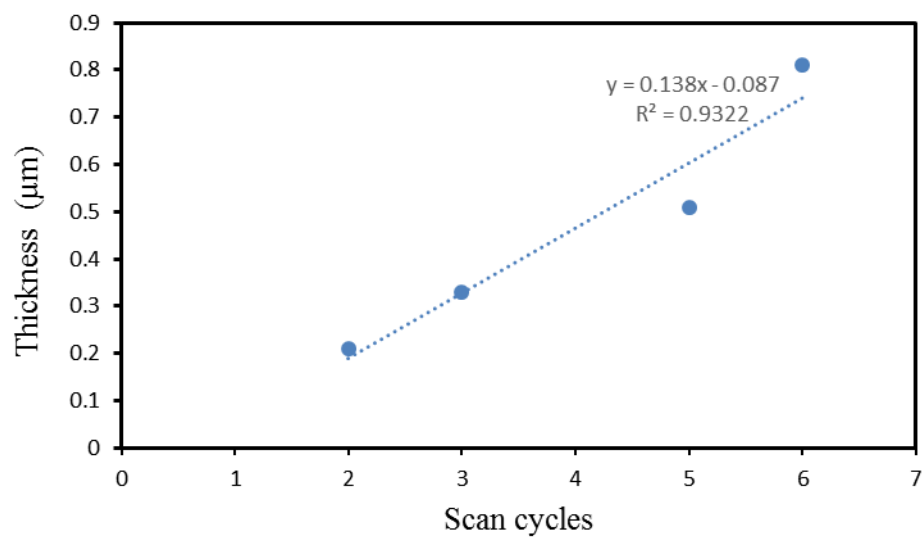

**Figure S2.** Relationship between scan cycles and film thickness

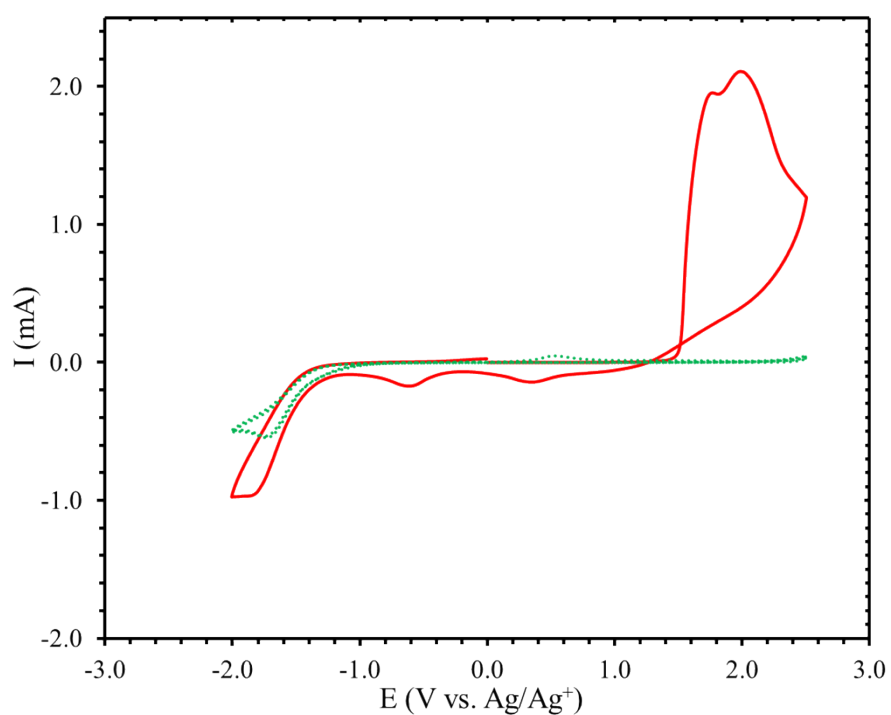

**Figure S3.** Cyclic voltammograms obtained in ProDOT-diene (5 mM) in ACN/TBAP (0.1 M) (solid red line) and in the background electrolyte (dashed green line) using a 0.5  $\text{cm}^2$  ITO coated glass electrode.

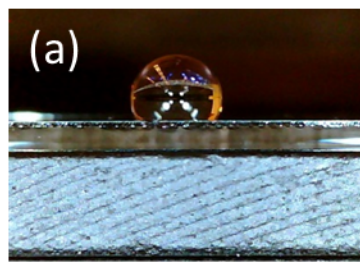

P(ProDOT-diene)  
130 °

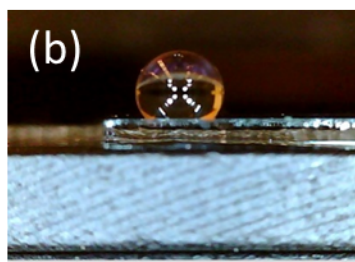

Ethylhexane thiol  
modified, 130 °

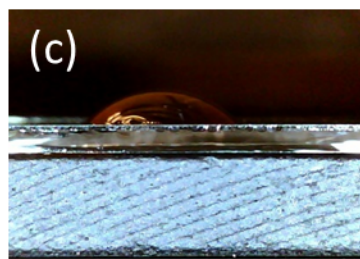

PEO<sub>6</sub> thiol  
modified, 50 °

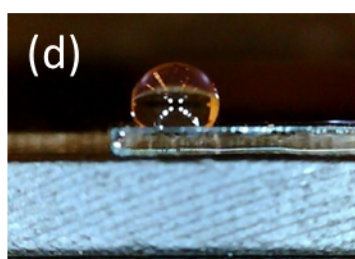

Ferrocene thiol  
modified, 131 °

**Figure S4.** Contact angle measurement of P(ProDOT-diene) film (a), Ethylhexane thiol modified film (b), PEO<sub>6</sub> thiol modified film (c) and Ferrocene thiol modified film (d).

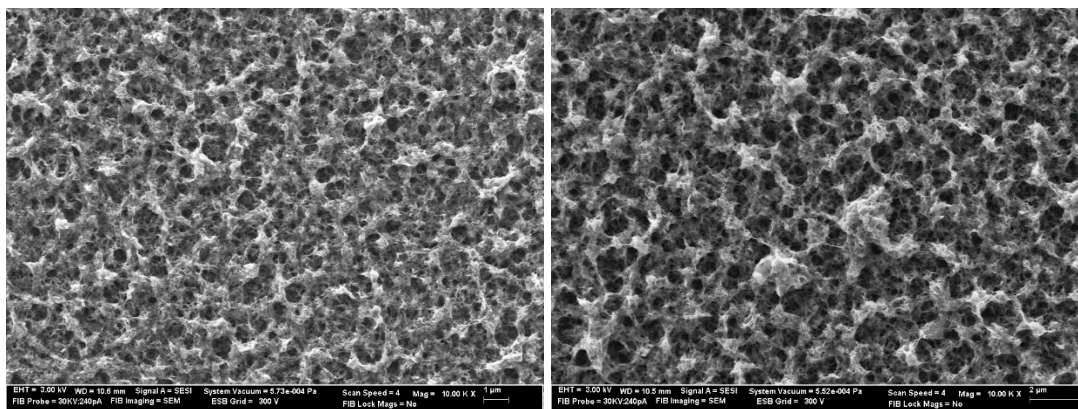

**Figure S5.** SEM images of PProDOT *via* CV deposition with different scan cycles. (4 cycles on the left, 6 cycles on the right)

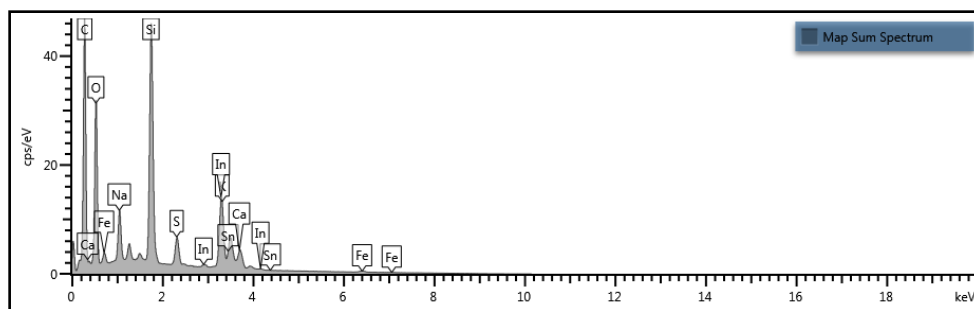

**Figure S6.** EDS analysis of ferrocene thiol modified P(ProDOT-diene)
